# Supplementary material for: Contrasting patterns of evolution following whole genome versus tandem duplication events inPopulus
Source: HighWire-hosted journal article supplement (doi:10.1101/gr.125146.111), 2011-10-05
Supplement: supp_table_1.docx [file supp_table_1.docx]

Supplemental Table 1. Tissues used for microarray experiments.

| **Name** | **Description** | **Collection Date** | **Genotype** |
| --- | --- | --- | --- |
| **G43h** | Seedlings were germinated from wild *P. trichocarpa* seeds in the lab at room temperature by placing surface-sterilized seeds on filter paper soaked with sterile water in Petri dishes. The Petri dishes were then incubated for 24 hr in the dark, and subsequently exposed to light under a 16-hr photoperiod. Light was provided by fluorescent tubes (TL70, F25T8/TL735, Philips) at a photon flux density of 45 µEm-2s-1. The seedlings were sampled 43 hr post imbibition. | 5/10/2005 | Unknown |
| **ApB** | Actively growing shoot apex; all recognizable leaves were removed (i.e., any leaflet longer than 1mm was removed). | 5/5/2005 | Nisqually-1 |
| **AxB** | Axillary bud, newly initiated. | 5/5/2005 | Nisqually-1 |
| **YFB** | Newly initiated female floral buds (immature catkins). | 6/13/2001 | Unknown |
| **YMB** | Newly initiated male floral buds. | 6/13/2001 | Unknown |
| **F** | Female catkins, post-fertilization. Inflorescence stems were removed. | 3/15/2005 | Unknown |
| **FM** | Female catkins, prior to seed release. The fruits had dehisce lines. Inflorescence stems were removed. | 5/4/2005 | Unknown |
| **M** | Male Catkins, 3 stages sampled: | 3/15/2005 | Unknown |
|  | Stage 1: 1-1.5 cm long compact |  |  |
|  | Stage 2: 4-5cm long, starting to elongate |  |  |
|  | Stage 3: more than 6 cm, elongated, flowers open |  |  |
|  | Inflorescence stems were removed. |  |  |
|  | RNA from Stages 1, 2 and 3 were extracted separately, quantified and equal RNA quantities were pooled before labeling. |  |  |
| **ML** | Mature Leaf (Leaf Plastochron Index 5). | 5/5/2005 | Nisqually-1 |
| **REF** | Washed fibrous roots < 0.5 cm diameter from field-grown trees. | 6/9/2005 | Nisqually-1 |
| **RTC** | Roots from plants in tissue culture (magenta boxes). |  | Nisqually-1 |
| **Xylem1** | Collected from actively growing trees. Bark was peeled and three- to six-cell layers from the wood side, representing developing xylem, were scraped into liquid nitrogen. | 8/24/2004 | Nisqually-1 |
| **Phloem3** | The bark was peeled and three- to six-cell layers from the bark side representing developing phloem/cambium, were scraped into liquid nitrogen. Same tissue source as xylem samples. | 8/24/2004 | Nisqually-1 |
| **PC** | Phloem + Cortex+ Epidermis. | 5/13/2005 | Nisqually-1 |
